# Supplementary material for: Auxin regulates functional gene groups in a fold-change-specific manner in Arabidopsis thaliana roots
Source: PubMed Central journal article supplement (PMC5449405; doi:10.1038/s41598-017-02476-8), 2017-05-30
Supplement: 41598_2017_2476_MOESM7_ESM.pdf [file 41598_2017_2476_MOESM7_ESM.pdf]

## Additional Information

### Auxin regulates functional gene groups in a fold-change-specific manner in *Arabidopsis thaliana* roots

*Omelyanchuk NA*<sup>1,2,#</sup>, *Wiebe DS*<sup>1,2,#</sup>, *Novikova DD*<sup>1,2</sup>, *Levitsky VG*<sup>1,2</sup>, *Klimova N*<sup>1</sup>, *Gorelova V*<sup>1,3</sup>, *Weinholdt C*<sup>4</sup>, *Vasiliev GV*<sup>1</sup>, *Zemlyanskaya EV*<sup>1,2</sup>, *Kolchanov NA*<sup>1,2</sup>, *Kochetov AV*<sup>1,2</sup>, *Grosse I*<sup>2,4,5,\*</sup>, *Mironova VV*<sup>1,2,\*</sup>

<sup>1</sup>Institute of Cytology and Genetics SB RAS, Novosibirsk, Russia

<sup>2</sup>LCT&EB, Novosibirsk State University, Novosibirsk, Russia

<sup>3</sup>Ghent University, Department of Physiology, Laboratory of Functional Plant Biology, Belgium

<sup>4</sup>Institute of Computer Science, Martin-Luther-University Halle-Wittenberg, Germany

<sup>5</sup>German Centre for Integrative Biodiversity Research (iDiv), Halle-Jena-Leipzig, Leipzig, Germany

#equal contribution

\*corresponding authors: [grosse@informatik.uni-halle.de](mailto:grosse@informatik.uni-halle.de)  
[victoria.v.mironova@gmail.com](mailto:victoria.v.mironova@gmail.com)

**Supplementary Table 2.** Primers sequences used in qPCR

| Gene ID   | Gene name      | Forward                        | Reverse                     |
|-----------|----------------|--------------------------------|-----------------------------|
| AT4G37390 | YDK            | CCATAATTCCGCTCCACAGT           | ACGCATTCTCCACTGCTTTT        |
| AT3G25190 | Nodulin-like21 | GAACATAAGACATCACTATCAGCA       | GTAAGAGCCATAGCCATCCA        |
| AT3G15540 | IAA19          | GAGCATGGATGGTGTGCCTTAT         | TTCGCAGTTGTCACCATCTTTC      |
| AT1G32450 | NRT1.5         | AACGTCGACACGATGAAGAAGAAAGAA    | TTGGTCGACTTTAGAATCCTTCTCTCG |
| AT1G69530 | EXPA1          | TTCTTGTTTATTGCTACCCTTGAG       | TACTACAACACGTCAATACCACACG   |
| AT1G15580 | IAA5           | CCGCTCTGCAAATTCTGTTC           | TCTCCAGCAAGCATCCAATC        |
| AT1G23080 | PIN7           | TATTGGATTACGTGGAGACCTATTG      | CAAGATTGCGGGATGAACATTATAC   |
| AT5G44020 | HAD            | CTTTGAAAGCTCCCAACCTAAAC        | TGGACGAACCATACACATTCC       |
| AT1G17060 | SOB7           | AAAACACGAACTCTTTCCAA           | TCTCCTCCTCTTTTGTCTCA        |
| AT2G39700 | ATHER          | GCAATTCTATTTACCACATTTGTTC      | TTCTCGAAACTCGCCTTAAAC       |
| AT3G61430 | ATPIP1         | TCTCCTTTGGAAGTTCTTCCTTG        | CTGGCCTTGTCTTAGTTGCTTC      |
| AT5G56870 | BGAL           | TGAGTGTTGCAGTGGGTCTC           | GTCCATCTCACACCGGAAC         |
| AT1G75750 | GASA1          | CTCTTATCGCTTCTCTTCTCATATCTCTT  | ACCATTTTTCTTCTGTGAGTTTTCG   |
| AT5G57090 | PIN2           | CTGGTCTTGAATGGCTATG            | CATCGCAAACCTGCTACTG         |
| AT5G25350 | EBF2           | CTCAGTCAATGACCTTGACATCTC       | GTAGAGTATATCGCACCTCCATAG    |
| AT4G34110 | PAR2           | GGGTCGGATGTTCCGGTATC           | GGAGCACTTCAGTCTGGTCC        |
| AT3G04720 | AtPR4, HEL     | TCTGACCATTGCGGTGGATAAGGC       | CTCAGTCAATGACCTTGACATCTC    |
| AT4G35100 | PIP3           | GCTCCTCTTCTCGACATGGGTGAG       | CTTGTGGCCGATGACAGTAGCGAC    |
| AT4G14560 | IAA1           | CGGTTAGATCTCACTGGAGCCAT        | ATCTGCTCCTCCTCTGCAAAAAC     |
| AT5G20820 | SAUR75         | CCGCTCTTCCAGCAGCTA             | AACTTCGCACGACACAGAGAT       |
| AT4G01630 | Expansin       | CAGTTTCTGCTGGTTGGTTG           | ATAACCACAAGCTCCACCCATT      |
| AT1G12110 | AtNRT1.1       | AACAAACACCCCCAAAACTGCA         | CCTTGGAAGTCCCAAGCATC        |
| AT1G02500 | SAM1           | CTCCCATCGAAGCAGAATGGA          | GACCGTGAAGTCTTGTAGCA        |
| AT1G77690 | LAX3           | TCACCATTGCTTCACTCCTTC          | AAGCACCATTGTGGTTGGAC        |
| AT1G70940 | PIN3           | GCGTCAATAAAAAACCCGAAAG         | GAAGCTCCTTGGCGTCATG         |
| AT1G72360 | ERF73/HRE1     | TCATGCTTCAGGCTCAGCATCAG        | ACGTATCTCAGCCGCCATCTT       |
| AT2G33790 | AGP30          | AAGGGCTCCGTTCTAAAGCC           | CCATCTCATTTGGGGCAGGT        |
| AT2G39370 | MAKR4          | CGAGAGTTCAGACGAAGATT           | CAACGGACGAAACCTAAACTA       |
| AT5G52900 | MAKR6          | CCATTGTGTAAGAGATTAAGGAGATGTAGA | GTCACAAGACCTTCTCCAATAAATCA  |
| AT1G32450 | NRT1.5         | AACGTCGACACGATGAAGAAGAAAGAA    | TTGGTCGACTTTAGAATCCTTCTCTCG |
| AT3G04720 | AtPR4,HEL      | GACCTCGTGGTCAAGCTTCT           | CTACATCCAAATCCAAGCCTC       |
| AT4G35100 | PIP3           | GCTCCTCTTCTCGACATGGGTGAG       | CTTGTGGCCGATGACAGTAGCGAC    |
| AT1G12110 | AtNRT1_1       | AACAAACACCCCCAAAACTGCA         | CCTTGGAAGTCCCAAGCATC        |
| AT4G01630 | Expansin       | CAGTTTCTGCTGGTTGGTTG           | ATAACCACAAGCTCCACCCATT      |
| AT1G25560 | AP2/ERF        | CACGCGGAGAAGCATTT              | CCACACTTTCCTGTTCTATC        |
| AT5G13930 | Cs             | GACTACTACTTCCGCATCAC           | CAGAGAAGGAGCCATGTAAG        |
| AT5G61600 | ERF104         | CAAGCGGCGTTTCAATTAC            | CAAGCGGCGTTTCAATTAC         |
| AT3G46600 | SLP30          | CATCTCCGGCTACAATATAC           | CTTGTTAGGAAGAAGGGTGAA       |
| AT3G19930 | STP4           | TCCTACTTGGTTTCGGAGT            | GCAGGGACACAAGCTAATC         |

**Supplementary Table 3.** qPCR analysis data.

| Gene ID   | Gene name  | Expression level*, control | Standart deviation | Expression level*, IAA | Standart deviation | T-test   | Log2 fold change |
|-----------|------------|----------------------------|--------------------|------------------------|--------------------|----------|------------------|
| AT4G37390 | YDK        | -1.72274396                | 0.217902           | 3.140770371            | 0.562023599        | 0.006875 | 4.92851321       |
| AT3G15540 | IAA19      | -1.7351189                 | 0.300426           | 3.38615628             | 0.785616244        | 0.010846 | 5.24928511       |
| AT1G69530 | EXPA1      | -3.37736281                | 0.268162           | 1.791446849            | 0.269409906        | 0.000103 | 3.33020244       |
| AT1G15580 | IAA5       | -3.62959743                | 0.873545           | 2.263181812            | 0.289258728        | 0.00644  | 5.74340986       |
| AT1G23080 | PIN7       | -0.54190015                | 0.580679           | 2.271323443            | 0.336178387        | 0.033348 | 2.76886894       |
| AT1G17060 | SOB7       | -0.63321966                | 0.187217           | 2.911808762            | 0.090817007        | 0.000745 | 3.5386284        |
| AT2G39700 | ATHER      | -4.05627399                | 0.621069           | 0.422515689            | 0.167458006        | 0.008596 | 4.40358209       |
| AT3G61430 | ATPIP1     | 0.304362854                | 0.269301           | -0.78251649            | 0.161598466        | 0.003865 | -1.09719947      |
| AT5G56870 | BGAL       | 0.043929624                | 0.591238           | -1.90985217            | 1.085868728        | 0.036151 | -1.77874834      |
| AT1G75750 | GASA1      | 0.29915429                 | 0.293104           | -2.03660066            | 0.10357497         | 0.007206 | -2.35298576      |
| AT5G57090 | PIN2       | -0.9357058                 | 0.391074           | 0.081859263            | 0.122886769        | 0.036163 | 0.98430222       |
| AT5G25350 | EBF2       | -2.77281059                | 0.732939           | 0.948514628            | 0.130138749        | 0.008655 | 3.59834746       |
| AT4G34110 | PAR2       | -0.43235303                | 0.376556           | 0.465041887            | 0.338376398        | 0.005512 | 0.89059051       |
| AT4G14560 | IAA1       | -0.85993405                | 0.113792           | -0.06759202            | 0.194211667        | 0.003419 | 0.79791963       |
| AT5G20820 | SAUR75     | -5.26945635                | 0.996482           | 0.243039802            | 0.827284809        | 0.002986 | 5.43206149       |
| AT1G77690 | LAX3       | -2.15160746                | 0.686551           | 0.696954756            | 0.609839024        | 0.000256 | 2.82419591       |
| AT1G70940 | PIN3       | -1.10241001                | 0.23585            | 1.015902836            | 0.322859793        | 0.000715 | 2.12957533       |
| AT1G72360 | ERF73/HRE1 | -0.41342909                | 0.368376           | -0.41252303            | 0.169501387        | 0.997384 | -0.02483679      |
| AT2G39370 | MAKR4      | -2.70960487                | 0.111471           | 1.569814569            | 0.243294461        | 0.000319 | 4.29057603       |
| AT5G52900 | MAKR6      | -4.40542229                | 0.589261           | 0.840660482            | 0.739505216        | 0.00304  | 5.27517581       |
| AT1G32450 | NRT1.5     | 0.937166972                | 0.184517           | -0.85352573            | 1.087592843        | 0.07963  | -1.55245615      |
| AT3G04720 | AtPR4,HEL  | 0.599036546                | 0.309925           | -1.58958880            | 0.317720208        | 0.005487 | -2.18784234      |
| AT4G35100 | PIP3       | 0.862066214                | 0.147165           | -0.35172548            | 0.282193398        | 0.004789 | -1.20106234      |
| AT1G12110 | AtNRT1.1   | 0.715056996                | 0.271019           | -1.32075384            | 0.295663252        | 0.008391 | -2.03374971      |
| AT4G01630 | Expansin   | -1.19410756                | 0.294521           | 0.065225107            | 0.279193983        | 0.00047  | 1.25757348       |
| AT1G25560 | AP2/ERF    | 0.126299563                | 0.110815           | 0.367896862            | 0.449710892        | 0.488406 | 0.28242268       |
| AT5G13930 | Cs         | 0.051343023                | 0.111352           | -0.91493037            | 0.485531645        | 0.050641 | -0.91387767      |
| AT5G61600 | ERF104     | 0.106270206                | 0.406333           | 0.084539126            | 0.049112137        | 0.934241 | -0.06035642      |
| AT3G46600 | SLP30      | 0.143571777                | 0.156479           | 0.540706899            | 0.330726498        | 0.279396 | 0.41571485       |
| AT3G19930 | STP4       | -0.00792563                | 0.330086           | -0.27154176            | 1.043629417        | 0.770901 | -0.0566253       |

\*- data was log2 normalized

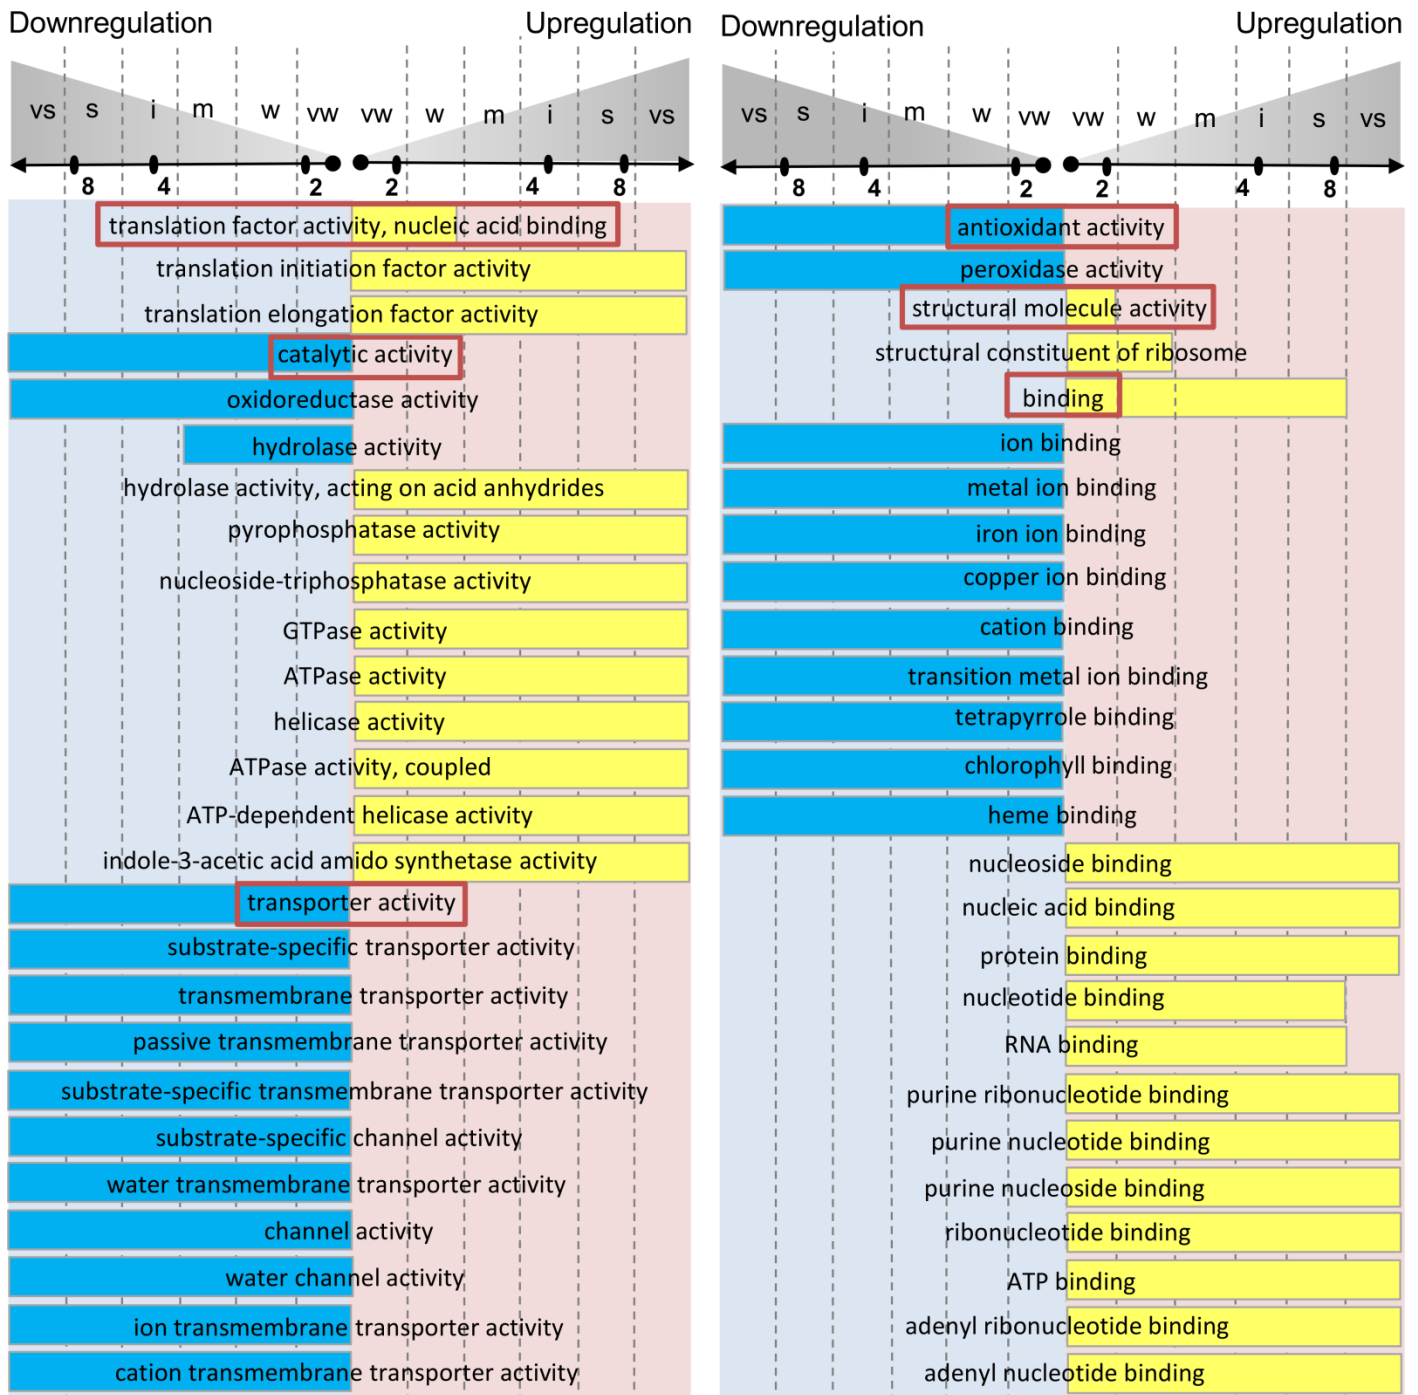

**Supplementary figure 1.** Auxin regulation of the gene groups encoding proteins with a particular molecular function. For a particular GO term it shows the fold change interval in which significant part of belonging genes responded to auxin. The longest intervals (from very weak to very strong) are not fold-change-specific, while shorter ones are fold-change-specific. Activation of transcription shown by yellow boxes, inhibition of transcription by blue boxes. The representative GO terms were selected from the complete list of significantly enriched in auxin response GO Molecular Function (Supplementary Table 4). Red rectangular highlights the common term for the GO terms group. vs – very strong, s – strong, i – intermediate, m – moderate, w – weak, vw – very weak.

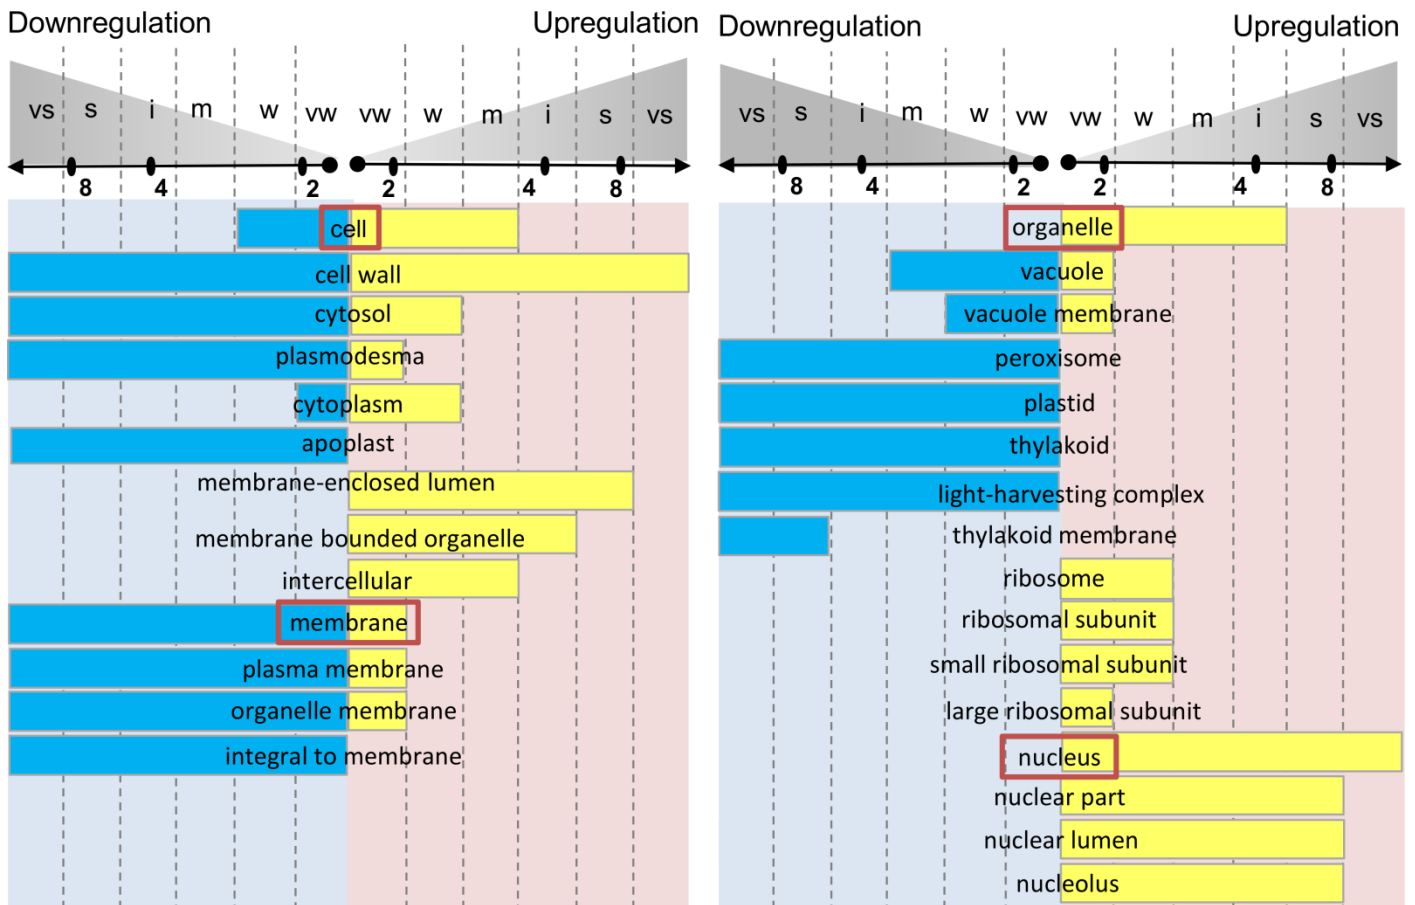

**Supplementary figure 2.** Auxin differentially regulates genes related to main cellular components. Auxin regulation of the gene groups encoding proteins with a particular molecular function. For a particular GO term it shows the fold change interval in which significant part of belonging genes responded to auxin. The longest intervals (from very weak to very strong) are not fold-change-specific, while shorter ones are fold-change-specific. Activation of transcription shown by yellow boxes, inhibition of transcription by blue boxes. The representative GO terms were selected from the complete list of significantly enriched in auxin response GO Cellular Component (Supplementary Table 4). Red rectangular highlights the common term for the GO terms group. vs – very strong, s – strong, i – intermediate, m – moderate, w – weak, vw – very weak.
